# Supplementary material
Source: PubMed Central journal article supplement (PMC8446343)
Supplement: NIHMS1725526-supplement-5.pdf [file NIHMS1725526-supplement-5.pdf]

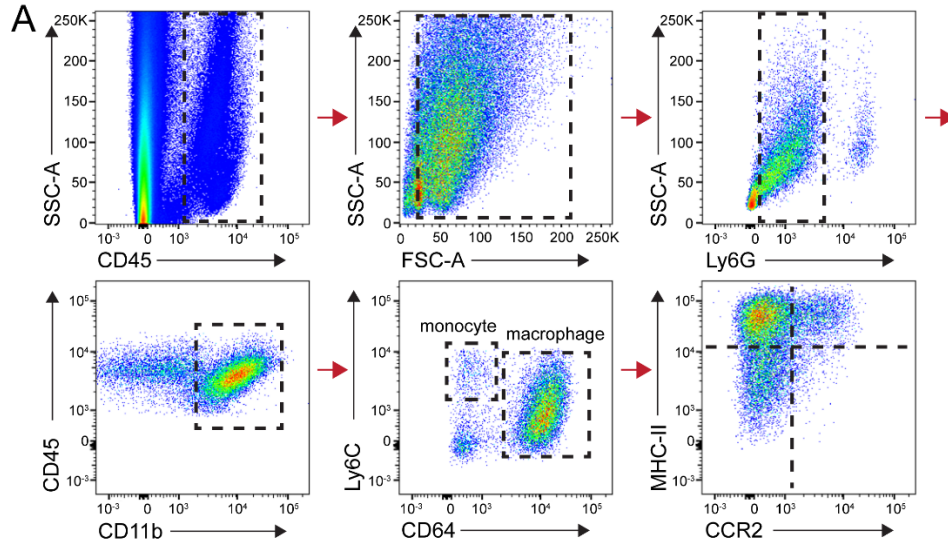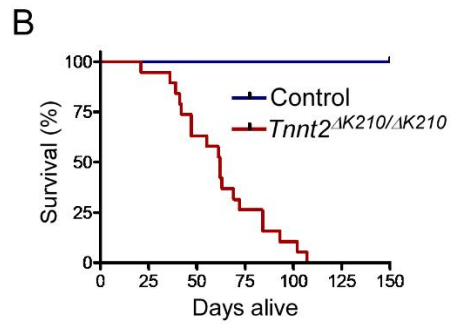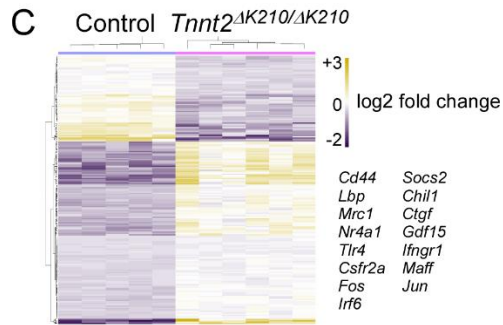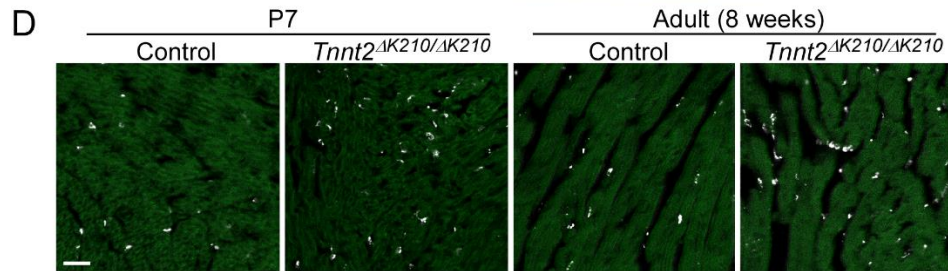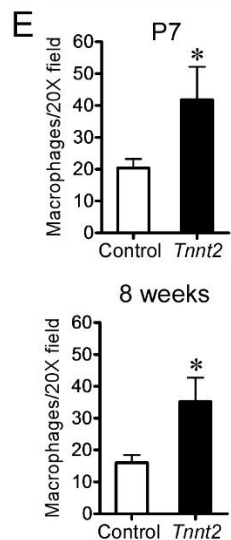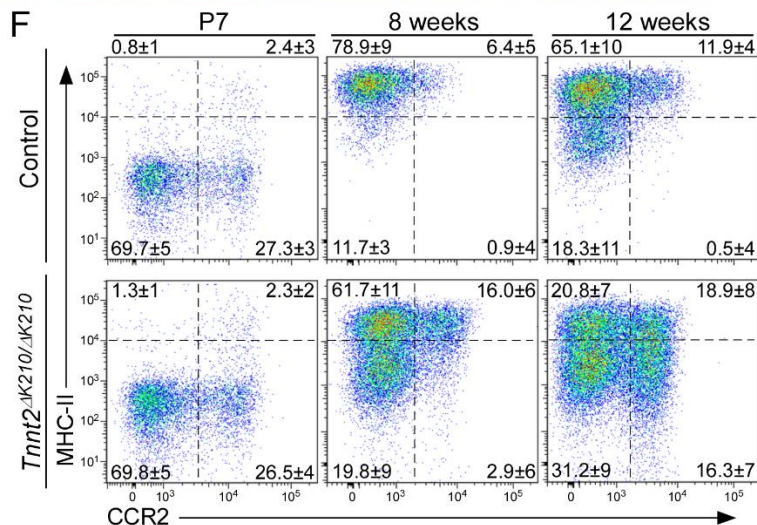

**Figure S1** (related to Figure 1). **Flow cytometry gating scheme and cardiac phenotype of *Tnnt2* <sup>$\Delta K210/\Delta K210$</sup>  mice across the spectrum of age.** **A**, Flow cytometry gating strategies for cardiac macrophages. **B**, Kaplan-Meier curve showing reduced survival of *Tnnt2* <sup>$\Delta K210/\Delta K210$</sup>  mice compared to controls (n>20 per group). **C**, Heat map showing genes differentially expressed in control and *Tnnt2* <sup>$\Delta K210/\Delta K210$</sup>  hearts at 8 weeks of age (n=5-6 per experimental group). Representative genes related to macrophages and innate immunity that were differentially expressed in *Tnnt2* <sup>$\Delta K210/\Delta K210$</sup>  hearts compared to controls are displayed. CPM: counts per million. FDR p<0.05 (control vs *Tnnt2*) for comparisons. **D-E**, Immunostaining of control and *Tnnt2* <sup>$\Delta K210/\Delta K210$</sup>  hearts showing increased numbers of CD68<sup>+</sup> (white) macrophages in *Tnnt2* <sup>$\Delta K210/\Delta K210$</sup>  hearts compared to controls at P7 and 8 weeks of age. Green: cardiac actin. \* denotes p<0.05 compared to controls. Mann-Whitney test. n=6 per experimental group. **E**, Flow cytometry of CD45<sup>+</sup>CD64<sup>+</sup>Ly6G<sup>-</sup> macrophages showing shifts in macrophage composition in control and *Tnnt2* <sup>$\Delta K210/\Delta K210$</sup>  hearts across the spectrum of age. n=6 per experimental group.

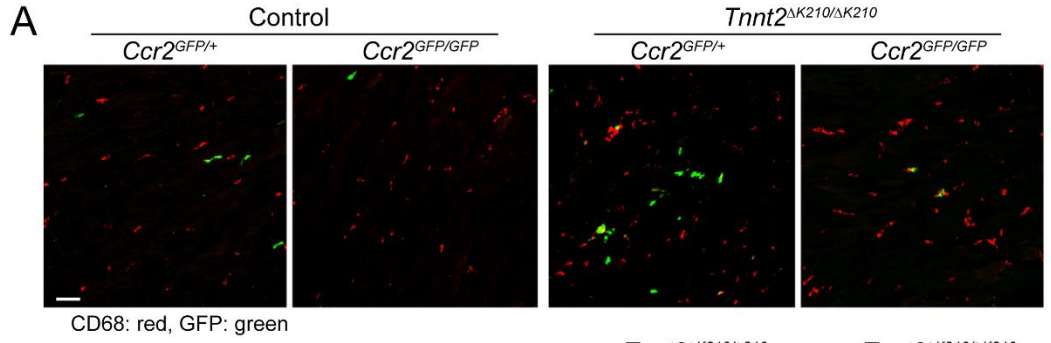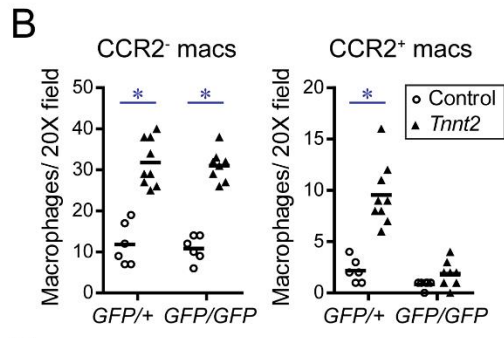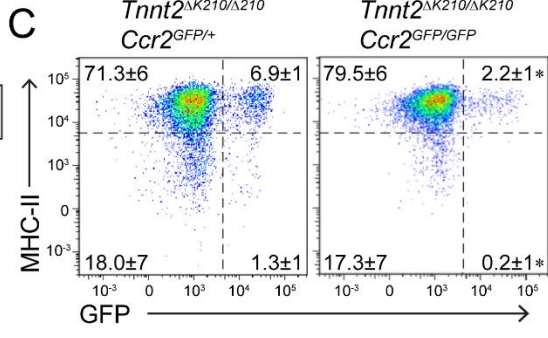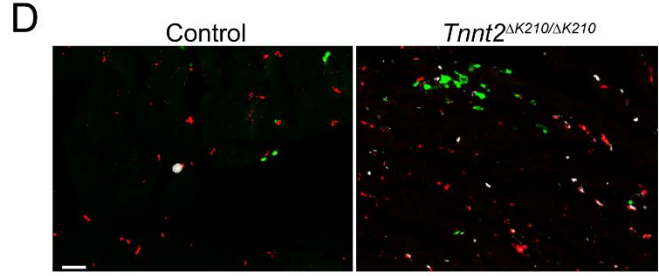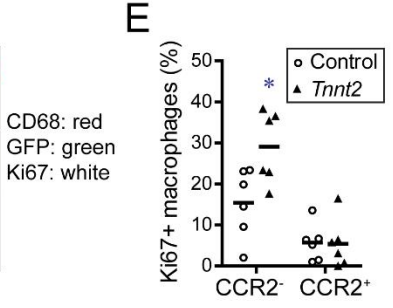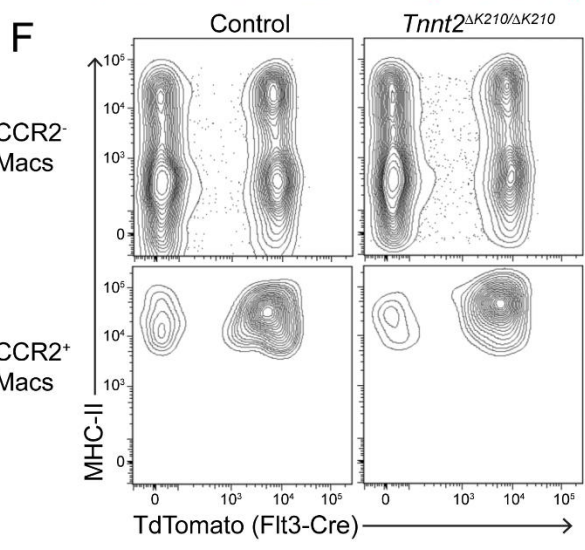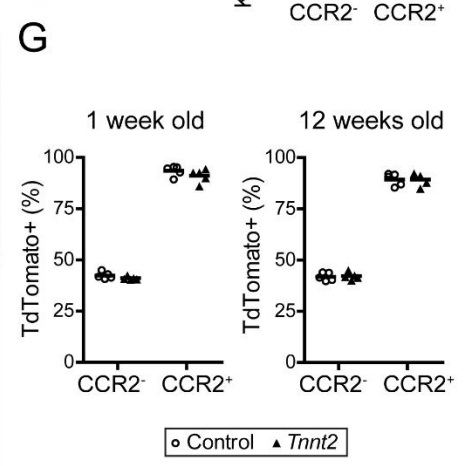

**Figure S2** (related to Figure 1). **Recruitment dynamics and origins of cardiac macrophages in control and *Tnnt2*<sup>ΔK210/ΔK210</sup> mice.** **A**, Immunostaining for CD68 (red) and GFP (green) in control (*Ccr2*<sup>GFP/+</sup>), *Ccr2*<sup>GFP/GFP</sup>, *Tnnt2*<sup>ΔK210/ΔK210</sup> *Ccr2*<sup>GFP/+</sup>, and *Tnnt2*<sup>ΔK210/ΔK210</sup> *Ccr2*<sup>GFP/GFP</sup> hearts at 8 weeks of age. Representative images of n=6-8 per experimental group. Scale bar 20μm **B**, Quantification of CCR2<sup>-</sup> and CCR2<sup>+</sup> macrophages in the LV myocardium of *Ccr2*<sup>GFP/+</sup>, *Ccr2*<sup>GFP/GFP</sup>, *Tnnt2*<sup>ΔK210/ΔK210</sup> *Ccr2*<sup>GFP/+</sup>, and *Tnnt2*<sup>ΔK210/ΔK210</sup> *Ccr2*<sup>GFP/GFP</sup> hearts. \* denotes p<0.05 compared to control (Mann-Whitney test). n=6-8 per experimental group. **C**, Flow cytometry of CD45<sup>+</sup>CD64<sup>+</sup>Ly6G<sup>-</sup> macrophages in *Tnnt2*<sup>ΔK210/ΔK210</sup> *Ccr2*<sup>GFP/+</sup> and *Tnnt2*<sup>ΔK210/ΔK210</sup> *Ccr2*<sup>GFP/GFP</sup> hearts at 8 weeks of age showing specific reductions in only CCR2<sup>+</sup> macrophages. \* denotes p<0.05 compared to *Tnnt2*<sup>ΔK210/ΔK210</sup> *Ccr2*<sup>GFP/GFP</sup> hearts (Mann-Whitney test). n=6 per experimental group. **D**, Immunostaining for CD68 (red), GFP (green), and Ki67 (white) in control and *Tnnt2*<sup>ΔK210/ΔK210</sup> hearts at 8 weeks of age showing increased proliferation of CCR2<sup>-</sup> macrophages in *Tnnt2*<sup>ΔK210/ΔK210</sup> hearts. n=6 per experimental group. Scale bar 20μm. **E**, Quantification of the percent of CCR2<sup>-</sup> and CCR2<sup>+</sup> macrophages that expressed Ki67. \* denotes p<0.05 compared to controls (Mann-Whitney test). n=6-8 per experimental group. **F-G**, Flow cytometry of CD45<sup>+</sup>CD64<sup>+</sup>Ly6G<sup>-</sup> macrophages in control (*Flt3-cre Rosa26-tdTomato*) and *Tnnt2*<sup>ΔK210/ΔK210</sup> *Flt3-cre Rosa26-tdTomato* hearts at 1 week and 12 weeks of age showing that the percent of CCR2<sup>-</sup> and CCR2<sup>+</sup> macrophages derived from definitive hematopoietic progenitors (tdTomato<sup>+</sup>) remains unchanged between control and *Tnnt2*<sup>ΔK210/ΔK210</sup> hearts. B, E, G: each data point represents a biologically independent replicate (n=5-6 per experimental group).

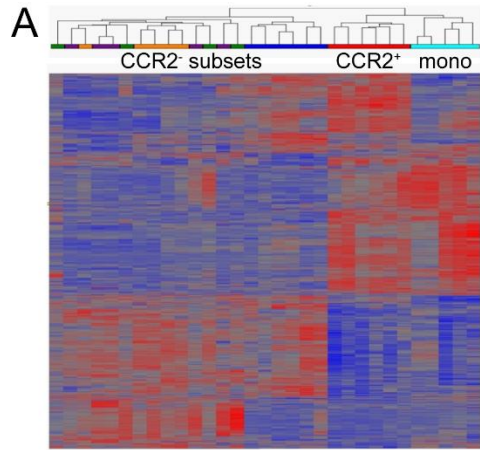

■ CCR2<sup>+</sup> MHCII<sup>hi</sup> Flt3<sup>+</sup>    ■ CCR2<sup>-</sup> MHCII<sup>lo</sup> Flt3<sup>+</sup>  
■ CCR2<sup>-</sup> MHCII<sup>hi</sup> Flt3<sup>-</sup>    ■ CCR2<sup>-</sup> MHCII<sup>lo</sup> Flt3<sup>-</sup>  
■ CCR2<sup>-</sup> MHCII<sup>hi</sup> Flt3<sup>+</sup>    ■ monocytes

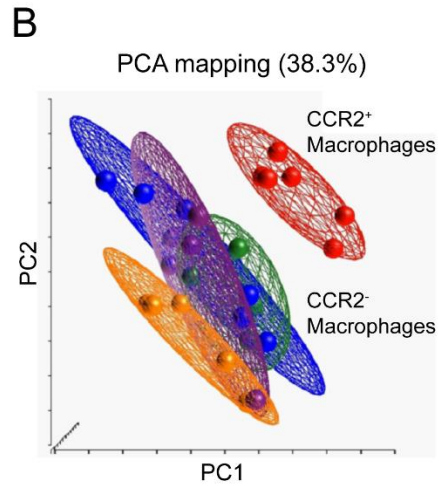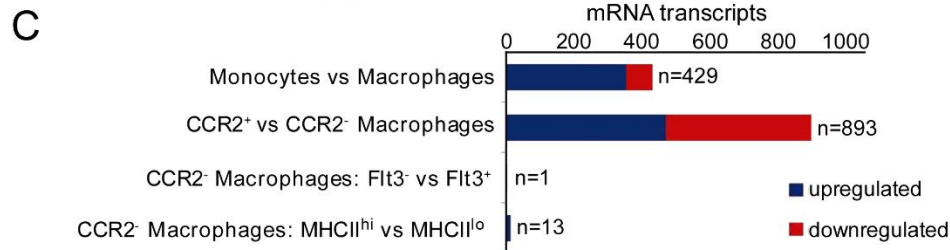

**D**

| CCR2 <sup>+</sup> Macrophages   | p-value  |
|---------------------------------|----------|
| Antigen processing/presentation | 9.0 e-10 |
| Immune response                 | 4.6 e-9  |
| Angiogenesis                    | 1.6 e-8  |
| Inflammatory response           | 4.3 e-6  |
| T-cell costimulation            | 6.8 e-4  |
| Integrin signaling              | 8.4 e-4  |

**E**

| CCR2 <sup>-</sup> Macrophages | p-value |
|-------------------------------|---------|
| Endocytosis                   | 6.8 e-5 |
| Transport                     | 1.5 e-4 |
| Nervous system development    | 2.2 e-3 |
| Cell migration                | 2.6 e-3 |
| Cell adhesion                 | 2.8 e-3 |

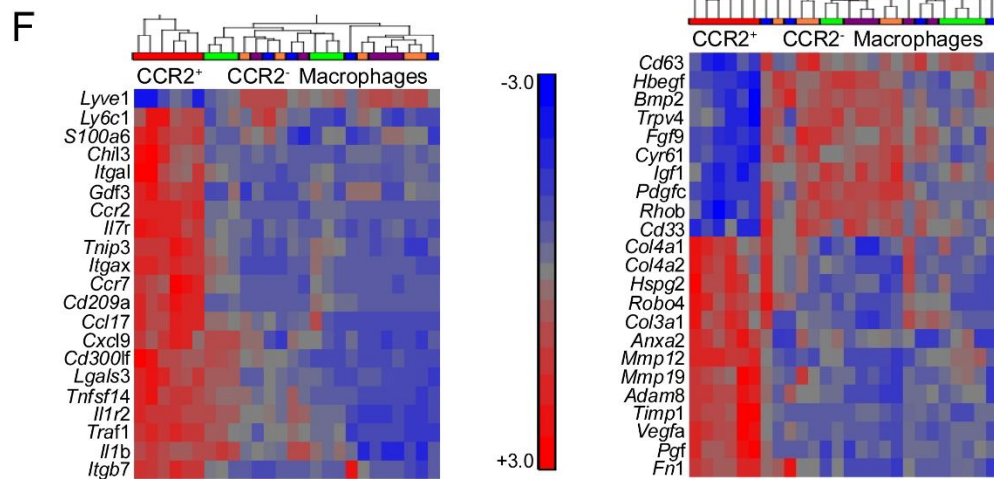

**Figure S3** (related to Figure 1). **CCR2<sup>-</sup> and CCR2<sup>+</sup> macrophages have distinct gene expression profiles in dilated cardiomyopathy.** **A**, Hierarchical Clustering of CCR2<sup>+</sup>MHCII<sup>hi</sup>Flt3<sup>+</sup>, CCR2<sup>-</sup>MHCII<sup>lo</sup>Flt3<sup>+</sup>, CCR2<sup>-</sup>MHCII<sup>hi</sup>Flt3<sup>+</sup>, CCR2<sup>-</sup>MHCII<sup>lo</sup>Flt3<sup>+</sup>, CCR2<sup>-</sup>MHCII<sup>hi</sup>Flt3<sup>+</sup>, and CCR2<sup>+</sup>Ly6C<sup>hi</sup> monocytes FACS sorted from 8-week-old *Tnnt2*<sup>ΔK210/ΔK210</sup> mice. n=5-7 per experimental group. **B**, Principal component analysis (PCA) highlighting that CCR2<sup>+</sup>MHCII<sup>hi</sup>Flt3<sup>+</sup> macrophages cluster independently from each of the CCR2<sup>-</sup> macrophage populations. Each data point represents biologically independent samples. **C**, Bar graph showing the number of differentially expressed genes (FDR p<0.05, fold change>1.5) for each of the listed comparisons. Blue: upregulated in *Tnnt2*<sup>ΔK210/ΔK210</sup> mice. Red: down regulated in *Tnnt2*<sup>ΔK210/ΔK210</sup> mice. **D**, Pathways enriched in CCR2<sup>+</sup> and CCR2<sup>-</sup> (all subgroups combined) macrophages. **F**, Heat maps listing individual genes differentially expressed in CCR2<sup>+</sup> and CCR2<sup>-</sup> macrophages. Scale bar denotes fold change.

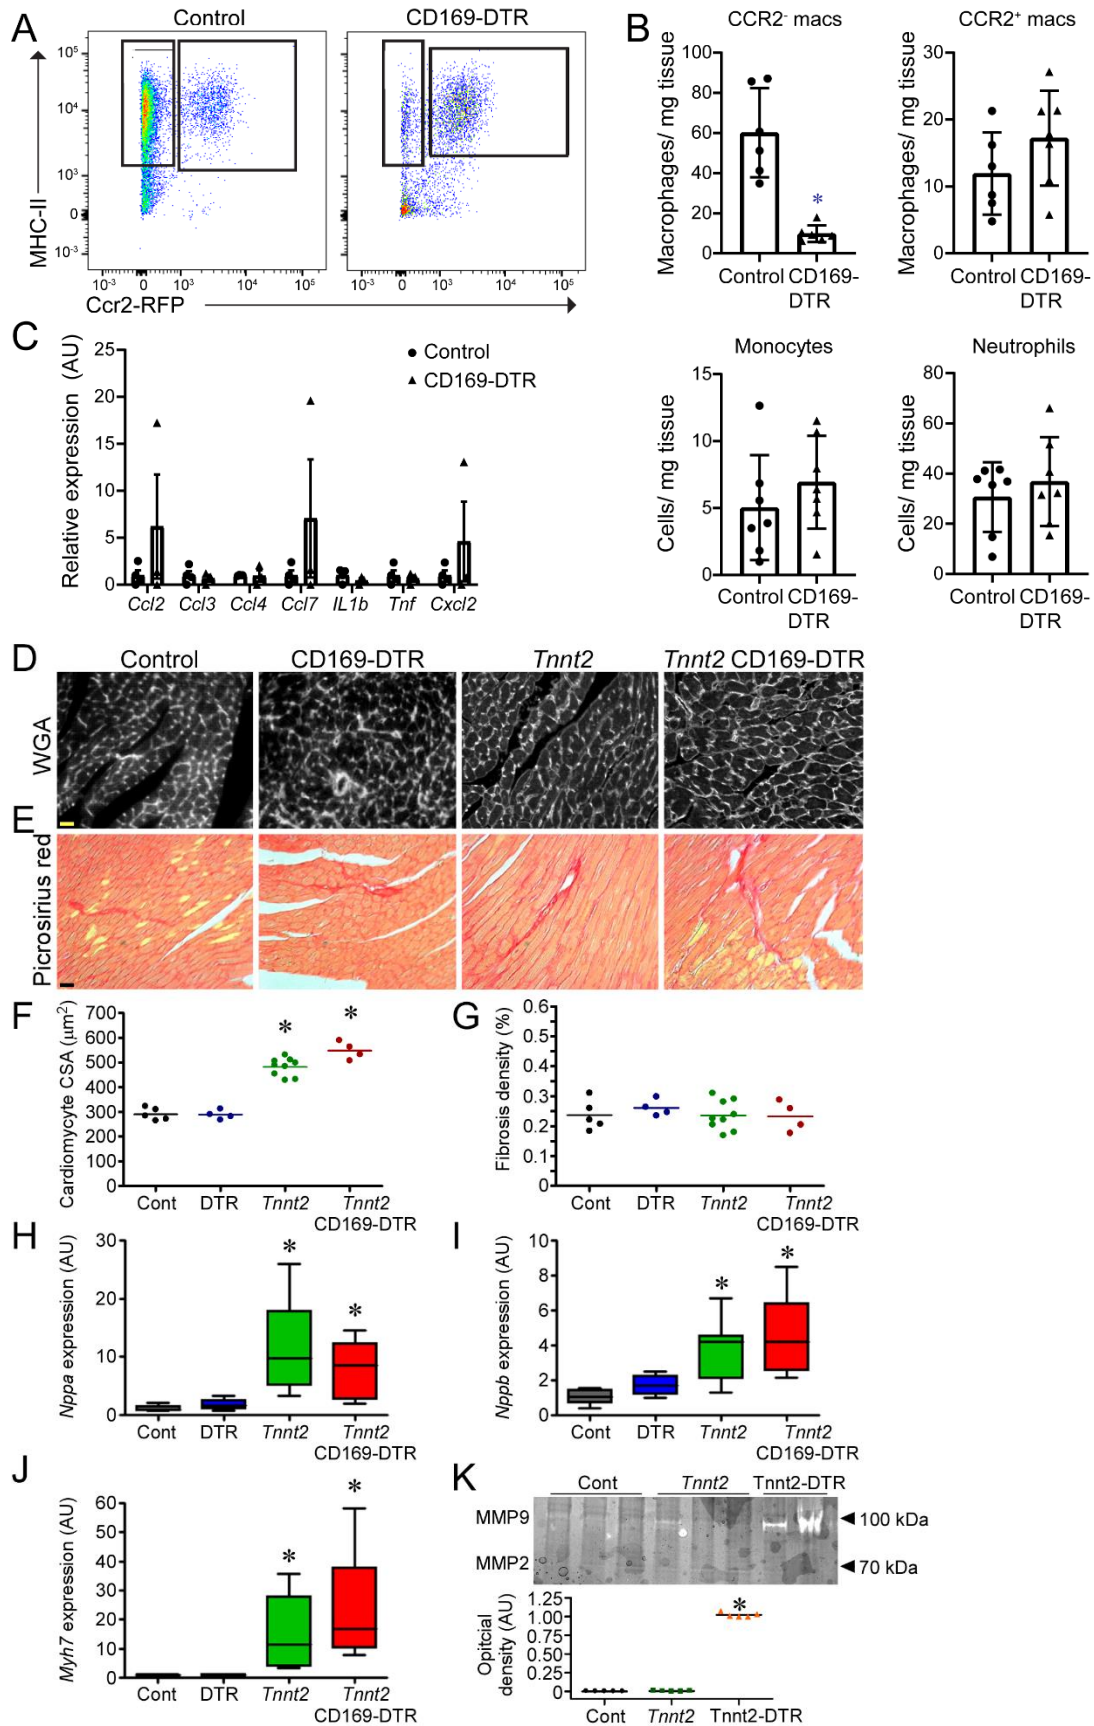

**Figure S4. CCR2<sup>-</sup> macrophage ablation and adverse LV remodeling** (related to Figures 2-4). **A**, Flow cytometry of macrophages (CD45<sup>+</sup>Ly6G<sup>-</sup>CD11b<sup>+</sup>CD64<sup>+</sup>) isolated from the hearts of control (*Cx3cr1-GFP/+ Ccr2-RFP/+*) and CD169-DTR (CD169-DTR *Cx3cr1-GFP/+ Ccr2-RFP/+*) mice. n=6 per experimental group. **B**, Quantification of flow cytometry data showing depletion of CCR2<sup>-</sup> macrophages and no changes in the abundance of CCR2<sup>+</sup> macrophages, monocytes, or neutrophils. Each data point denotes a biologically independent sample (n=6 per experimental group). \* denotes p<0.05 compared to controls (Mann-Whitney test). **C**, Quantitative RT-PCR for chemokine and cytokine mRNA expression in CCR2<sup>+</sup> macrophages isolated from control (*Cx3cr1-GFP/+ Ccr2-RFP/+*) and CD169-DTR (CD169-DTR *Cx3cr1-GFP/+ Ccr2-RFP/+*) hearts. Each data point denotes a biologically independent sample (n=4-6 per experimental group). No statistically significant differences were observed (Mann-Whitney test). **D-E**, Wheat germ agglutinin (WGA, D) and Picrosirius red (E) staining of control, CD169-DTR, *Tnnt2*<sup>ΔK210/ΔK210</sup>, and *Tnnt2*<sup>ΔK210/ΔK210</sup> CD169-DTR hearts after 3 weeks of DT treatment. Scale bar 20μm **F-G**, Quantification of cardiomyocyte cross-sectional area and fibrotic density in the hearts of control, CD169-DTR, *Tnnt2*<sup>ΔK210/ΔK210</sup>, and *Tnnt2*<sup>ΔK210/ΔK210</sup> CD169-DTR mice after 3 weeks of DT treatment. \* denotes p<0.05 compared to controls. Each data point represents a biologically independent replicate. **H-J**, Box and whisker plots of *Nppa*, *Nppb*, and *Myh7* mRNA expression in control, CD169-DTR, *Tnnt2*<sup>ΔK210/ΔK210</sup>, and *Tnnt2*<sup>ΔK210/ΔK210</sup> CD169-DTR hearts after 3 weeks of DT treatment. \* denotes p<0.05 compared to controls. n=5-6 per experimental group. **K**, Gelatinase activity assay showing minimal metalloproteinase (MMP) activity in control and *Tnnt2*<sup>ΔK210/ΔK210</sup> hearts. *Tnnt2*-DTR mice (DT-cardiomyocyte ablation model) treated with DT were included as a positive control as they display marked increase in MMP activity following cardiomyocyte cell death and resultant inflammatory cell infiltration. \* denotes p<0.05 compared to controls. Each data point represents a biologically independent replicate. n=4-9 per experimental group.



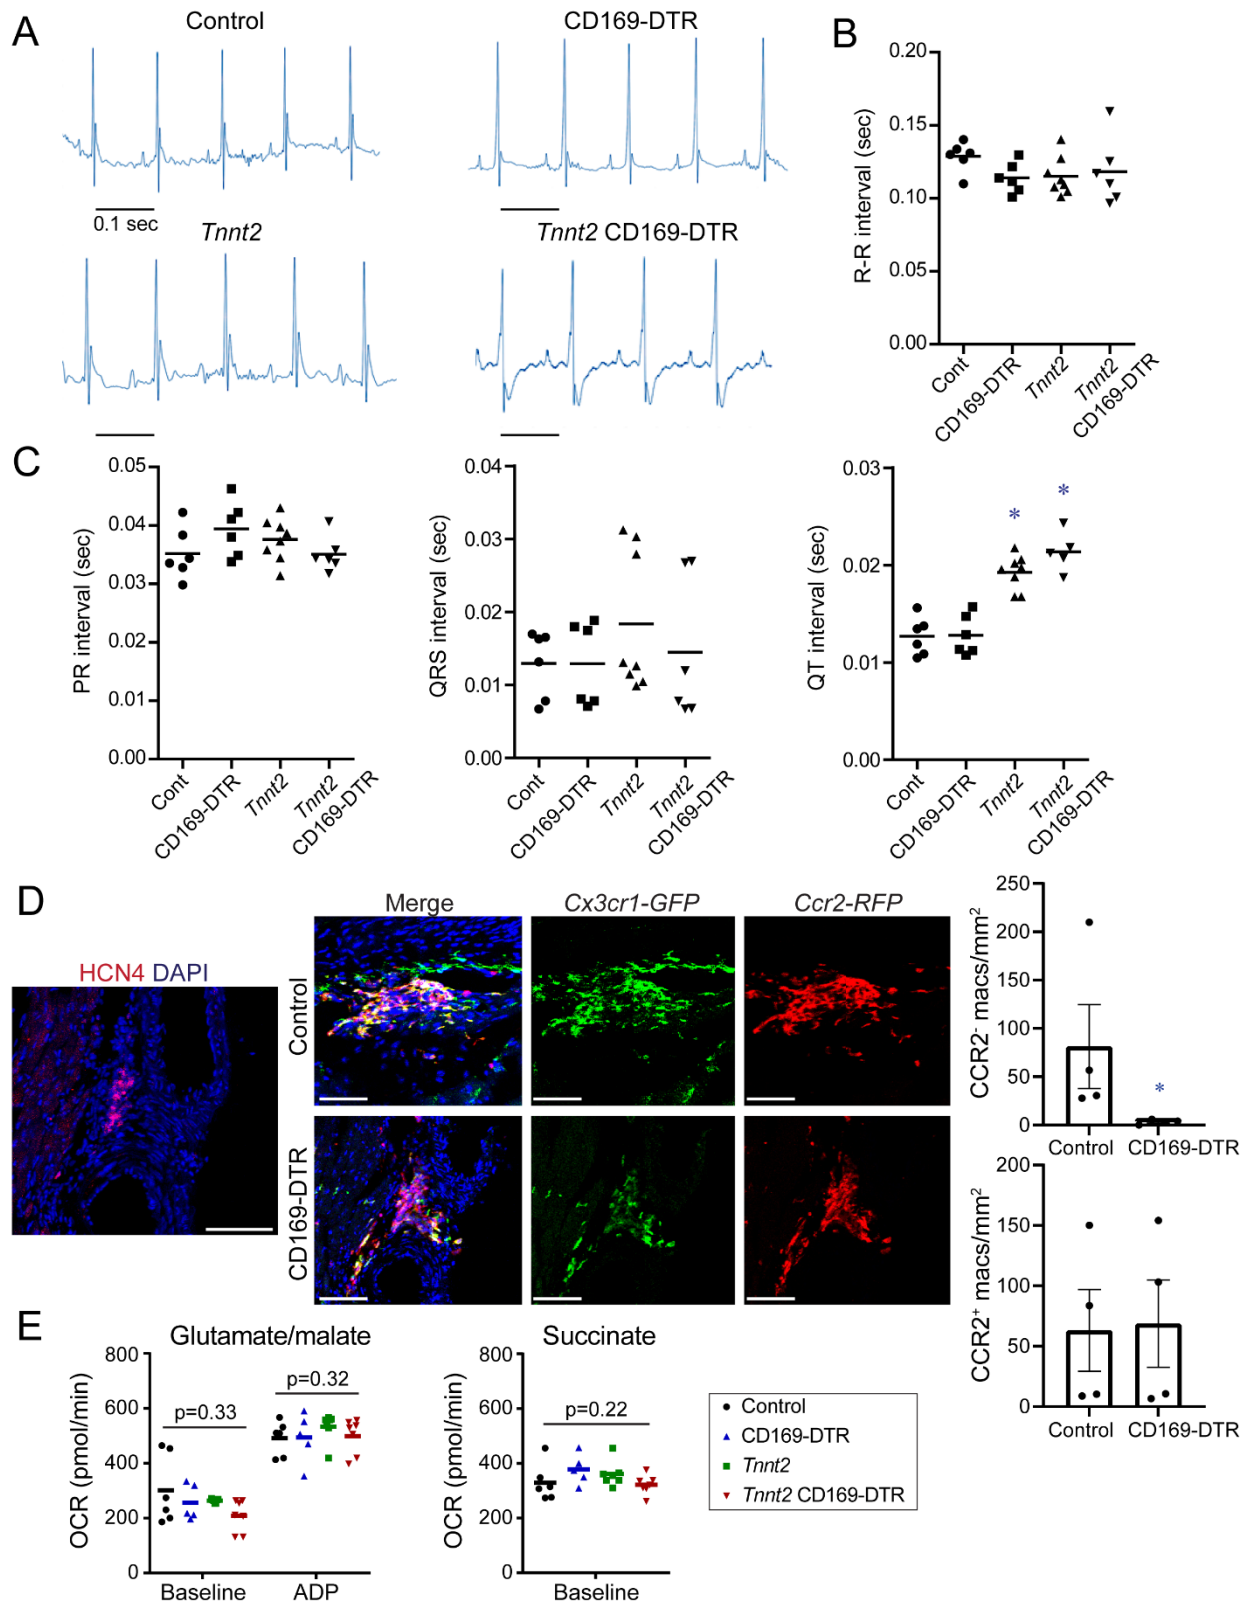

**Figure S5** (related to Figures 2-4). **Telemetry, atrioventricular node macrophages, and myocardial metabolism following CCR2<sup>-</sup> macrophage depletion.** **A**, Representative ECG tracings of control, CD169-DTR, *Tnnt2*<sup>ΔK210/ΔK210</sup>, and *Tnnt2*<sup>ΔK210/ΔK210</sup> CD169-DTR hearts after 3 weeks of DT treatment. **B-C**, Quantification of R-R, PR, QRS, and QT intervals in each experimental group. Prolongation of the QT interval was observed in *Tnnt2*<sup>ΔK210/ΔK210</sup> and *Tnnt2*<sup>ΔK210/ΔK210</sup> CD169-DTR hearts compared to controls. \* denotes p<0.05 compared to controls. Each data point represents a biologically independent replicate. 6-8 mice per experimental group. **D**, *Left*, representative image of HCN4 immunostaining (red) showing staining in the atrioventricular node. DAPI: blue. Scale bar 100μm. *Center*, immunostaining for GFP (green) and RFP (red) in the atrioventricular node of control (*Cx3cr1-GFP/+ Ccr2-RFP/+*) and CD169-DTR (CD169-DTR *Cx3cr1-GFP/+ Ccr2-RFP/+*) mice. The atrioventricular node region was identified in serial sections using HCN4 staining. DAPI: blue. Scale bar 50μm. *Right*, quantification of CCR2<sup>-</sup> and CCR2<sup>+</sup> macrophages in the atrioventricular node of control (*Cx3cr1-GFP/+ Ccr2-RFP/+*) and CD169-DTR (CD169-DTR *Cx3cr1-GFP/+ Ccr2-RFP/+*) mice. \* denotes p<0.05 compared to controls. Each data point represents a biologically independent replicate (n=4). All immunostaining studies were performed in 4 independent specimens. **E**, Oxygen consumption rate (OCR) in mitochondria isolated from the hearts of control, CD169-DTR, *Tnnt2*<sup>ΔK210/ΔK210</sup>, and *Tnnt2*<sup>ΔK210/ΔK210</sup> CD169-DTR mice after 3 weeks of DT treatment. Mitochondria were provided either glutamate/malate or succinate substrates. ADP was added to measure maximal OCR. Each data point represents mitochondria preparations from an individual hearts. n=5-6 mice per experimental group.

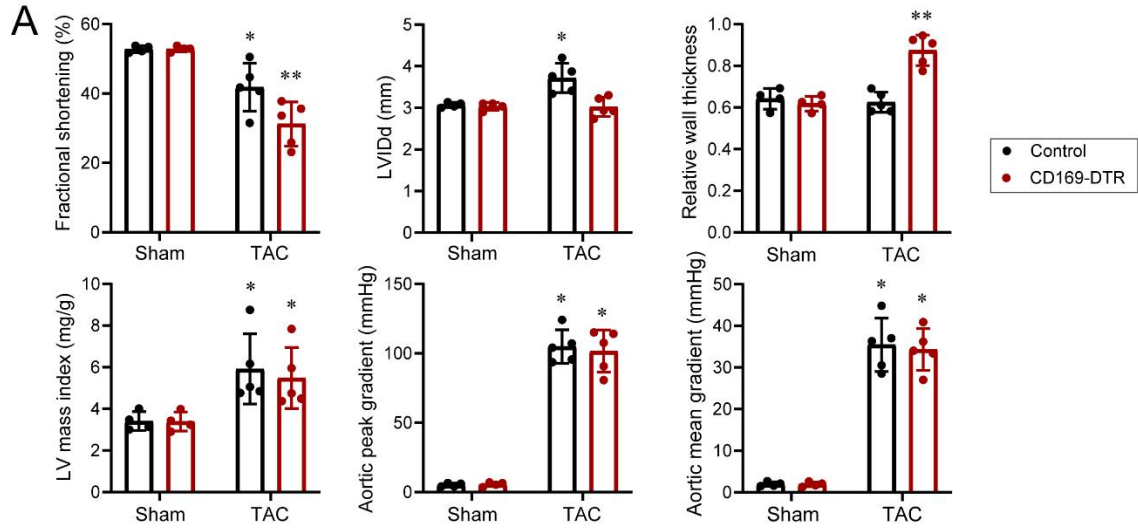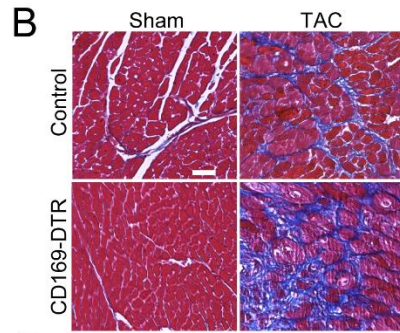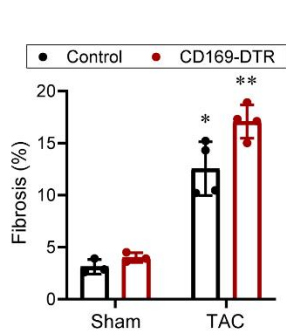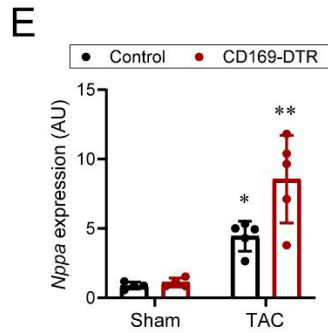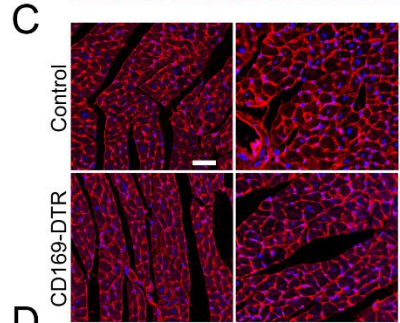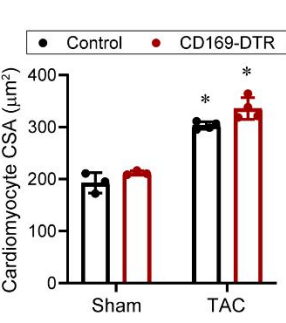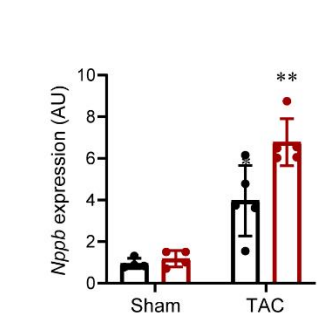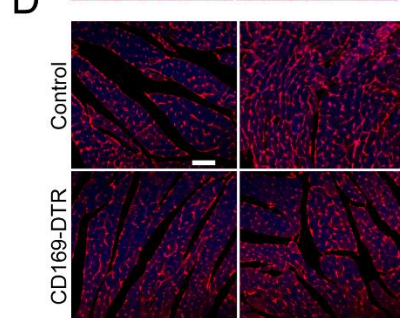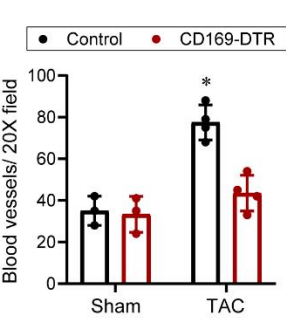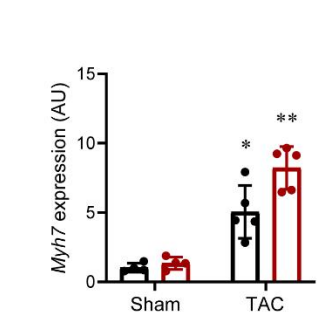

**Figure S6** (related to Figures 2-4). **CCR2<sup>-</sup> Macrophages Promote Adaptive Remodeling following Pressure Overload.** **A**, Echocardiographic analysis of control and CD169-DTR mice performed 4 weeks after sham surgery or transverse aortic constriction (TAC). \* denotes  $p < 0.05$  compared to control, \*\* denotes  $p < 0.05$  compared to control TAC group (ANOVA, post-hoc Tukey).  $n = 4-5$  per experimental group. LVIDd: LV end diastolic dimension. **B-D**, Quantification of myocardial fibrosis (B, Trichrome staining, scale bar  $20\mu\text{m}$ ), cardiomyocyte cross-sectional area (C, WGA staining, scale bar  $20\mu\text{m}$ ), and myocardial microvascular density (D, CD34 staining, scale bar  $40\mu\text{m}$ ) in control and CD169-DTR hearts 4 weeks after sham surgery or TAC. \* denotes  $p < 0.05$  compared to control, \*\* denotes  $p < 0.05$  compared to control TAC group. Each data point represents a biologically independent sample. **E**, RT-PCR measuring the expression of *Nppa*, *Nppb*, and *Myh7* mRNA in the hearts of control and CD169-DTR mice 4 weeks after sham surgery or TAC. \* denotes  $p < 0.05$  compared to control, \*\* denotes  $p < 0.05$  compared to control TAC group. Each data point represents a biologically independent sample.

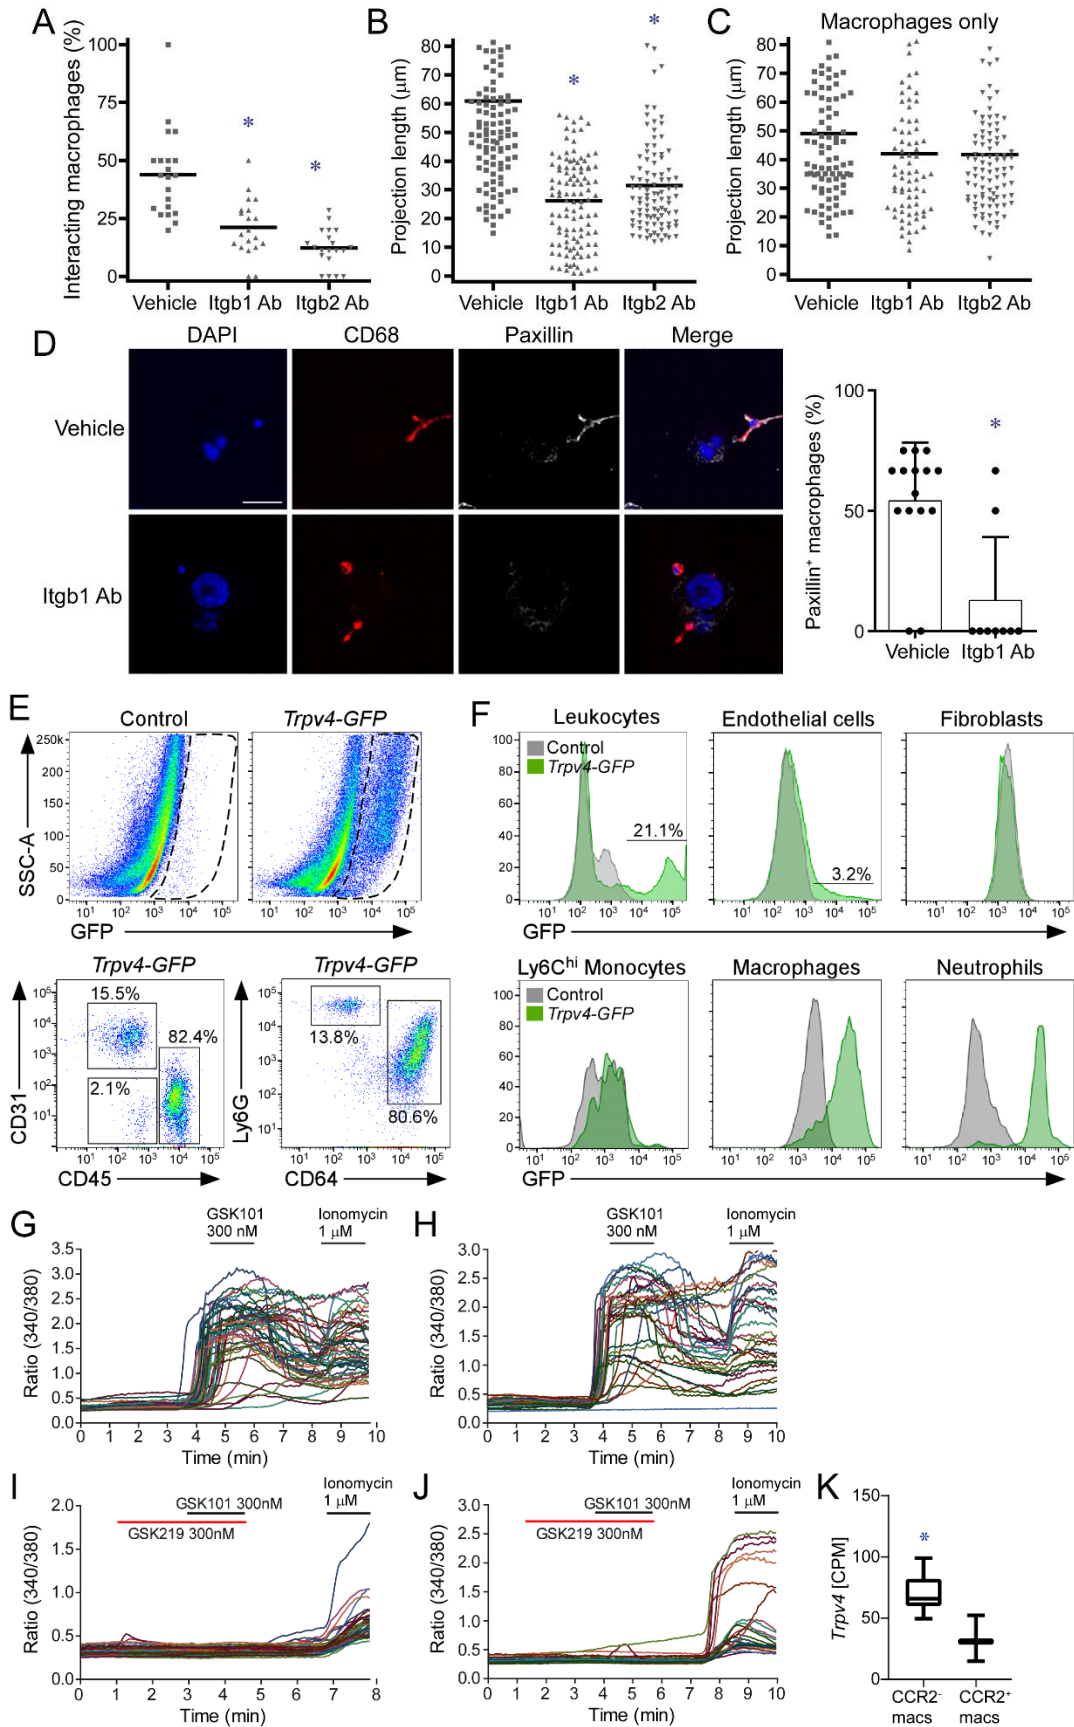

**Figure S7** (related to Figures 5-6).  **$\beta$ -integrin mediated macrophage-cardiomyocyte interaction, TRPV4 expression, and TRPV4 activity in cardiac macrophages.** **A-B**, Quantification of the percent of macrophages interacting with cardiomyocytes (A) and macrophage projection length (B) in co-cultures treated with either isotype antibody (vehicle), Itgb1 neutralizing antibody, or Itgb2 neutralizing antibody. **C**, Quantification of projection length in bone marrow-derived macrophages cultured independently in the presence of isotype antibody (vehicle), Itgb1 neutralizing antibody, or Itgb2 neutralizing antibody. \* denotes  $p < 0.05$  compared to control (ANOVA, post-hoc Tukey). **D**, CD68 (red) and Paxillin (white) immunostaining showing loss of Paxillin expression in cultured macrophages treated with the neutralizing Itgb1 antibody. Blue-DAPI. Scale bar 20 $\mu$ m. Representative images from 4 independent experiments. \* denotes  $p < 0.05$  compared to vehicle control (Mann-Whitney test). Each data point in A-C represents information compiled from 4 experimental replicates. Experiments were repeated 4 times and all data was incorporated into the displayed graphs. **E**, Flow cytometry of *Trpv4-GFP* BAC transgenic hearts showing GFP expression in leukocytes (CD45<sup>+</sup>), endothelial cells (CD31<sup>+</sup>CD45<sup>-</sup>), neutrophils (Ly6G<sup>+</sup>CD64<sup>-</sup>), and macrophages (CD64<sup>+</sup>Ly6G<sup>-</sup>). Percentages of each cell type as a function of the number of GFP<sup>+</sup> cells is shown. **F**, Histograms showing GFP mean fluorescent intensity of CD45<sup>+</sup> leukocytes, CD31<sup>+</sup>CD45<sup>-</sup> endothelial cells, MEFSK4<sup>+</sup>CD45<sup>-</sup>CD31<sup>-</sup> fibroblasts, Ly6C<sup>hi</sup> monocytes, CD64<sup>+</sup>Ly6C<sup>lo</sup> macrophages, and Ly6G<sup>+</sup> neutrophils isolated from littermate controls (grey) and *Trpv4-GFP* (green) hearts. Percentages of GFP<sup>+</sup> leukocytes and endothelial cells are shown as a function of total number of leukocytes and endothelial cells, respectively. Data obtained from 3 independent experiments. **G-H**, Ratiometric calcium assays showing that CCR2<sup>-</sup> (C) and CCR2<sup>+</sup> (D) macrophages isolated from the adult mouse heart by flow cytometry express active TRPV4 channels. GSK101: TRPV4 agonist, Ionomycin: calcium ionophore. **I-J**, Ratiometric calcium assays showing that the TRPV4 antagonist (GSK219) blocks rises in intracellular calcium induced by GSK101 in cardiac CCR2<sup>-</sup> (E) and CCR2<sup>+</sup> (F) macrophages. Each tracing represents an independently analyzed cell. Tracings were compiled from 3 independent experiments. **K**, *Trpv4* mRNA expression in CCR2<sup>-</sup> and CCR2<sup>+</sup> cardiac macrophages. RNAseq data derived from Immgen (Immunological Genome, 2020). CPM: counts per million. \* denotes  $p < 0.05$  compared to CCR2<sup>+</sup> macrophages (Mann-Whitney test). Data obtained from 5 biologically independent samples per experimental group.

**Table S1.** (related to Figure 1) **Serial echocardiography of Control and *Tnnt2*<sup>ΔK210/ΔK210</sup> mice**

|                             | Control      | <i>Tnnt2</i> <sup>ΔK210/ΔK210</sup> |
|-----------------------------|--------------|-------------------------------------|
| Fractional shortening (%)   |              |                                     |
| 7 days                      | 48.7 ± 3.4   | 28.6 ± 3.4*                         |
| 14 days                     | 50.6 ± 3.1   | 26.0 ± 5.5*                         |
| 28 days                     | 60.7 ± 3.6   | 30.5 ± 2.9*                         |
| 8 weeks                     | 52.1 ± 1.3   | 21.9 ± 3.7*                         |
| 16 weeks                    | 53.1 ± 2.1   | 14.2 ± 4.7*                         |
| LV diastolic dimension (μm) |              |                                     |
| 7 days                      | 2.12 ± 0.12  | 2.18 ± 0.16                         |
| 14 days                     | 2.28 ± 0.12  | 2.81 ± 0.23*                        |
| 28 days                     | 2.77 ± 0.33  | 3.78 ± 0.27**                       |
| 8 weeks                     | 3.11 ± 0.44  | 4.38 ± 0.40**                       |
| 16 weeks                    | 2.90 ± 0.47  | 4.39 ± 0.46*                        |
| Relative wall thickness     |              |                                     |
| 7 days                      | 0.48 ± 0.08  | 0.43 ± 0.03                         |
| 14 days                     | 0.47 ± 0.05  | 0.49 ± 0.03                         |
| 28 days                     | 0.60 ± 0.14  | 0.40 ± 0.04*                        |
| 8 weeks                     | 0.64 ± 0.10  | 0.45 ± 0.04*                        |
| 16 weeks                    | 0.64 ± 0.10  | 0.47 ± 0.06*                        |
| LV mass (mg)                |              |                                     |
| 7 days                      | 21.9 ± 2.9   | 21.4 ± 5.1                          |
| 14 days                     | 26.7 ± 3.7   | 53.0 ± 11.7*                        |
| 28 days                     | 65.9 ± 4.9   | 98.3 ± 15.6**                       |
| 8 weeks                     | 104.5 ± 20.8 | 179.2 ± 34.1**                      |
| 16 weeks                    | 98.7 ± 17.6  | 173.8 ± 29.5*                       |

\* denotes  $p < 0.05$  compared to control, \*\* denotes  $p < 0.05$  compared to earlier *Tnnt2*<sup>ΔK210/ΔK210</sup> groups (ANOVA, post-hoc Tukey). n=5-6 per experimental group. LV: left ventricle. Mean values and standard deviations are displayed.

**Table S2.** (related to Figure 2) **Serum chemistries, cytokines, blood counts, and organ weights of control, *CD169-DTR*, *Tnnt2* <sup>$\Delta$ K210/ $\Delta$ K210</sup>, and *Tnnt2* <sup>$\Delta$ K210/ $\Delta$ K210</sup> *CD169-DTR* mice**

|                                  | Control     |                  | <i>Tnnt2</i> <sup><math>\Delta</math>K210/<math>\Delta</math>K210</sup> |                  |
|----------------------------------|-------------|------------------|-------------------------------------------------------------------------|------------------|
|                                  | -           | <i>CD169-DTR</i> | -                                                                       | <i>CD169-DTR</i> |
| BUN (mg)/dL                      | 44.7 ± 7.2  | 41.6 ± 4.8       | 40.7 ± 4.8                                                              | 45.2 ± 5.8       |
| Creatinine (mg/dL)               | 0.55 ± 0.08 | 0.51 ± 0.1       | 0.62 ± 0.07                                                             | 0.63 ± 0.1       |
| Calcium (mg/dL)                  | 9.3 ± 0.9   | 10.0 ± 0.7       | 10.0 ± 0.6                                                              | 10.4 ± 1.3       |
| Protein (g/dL)                   | 5.5 ± 0.7   | 5.5 ± 0.7        | 5.2 ± 0.6                                                               | 6.0 ± 0.5        |
| Bilirubin (mg/dL)                | 0.11 ± 0.06 | 0.13 ± 0.1       | 0.10 ± 0.06                                                             | 0.14 ± 0.1       |
| ALT (units/L)                    | 94.7 ± 25   | 86.0 ± 34        | 78.4 ± 20                                                               | 101 ± 31         |
| TNF (ng/μl)                      | 16.0 ± 2.4  | 15.9 ± 3.2       | 22.0 ± 3.1*                                                             | 22.8 ± 4.2*      |
| IL1β (ng/μl)                     | 9.9 ± 1.4   | 8.7 ± 1.8        | 14.1 ± 2.6*                                                             | 11.7 ± 2.9*      |
| WBC (x10 <sup>3</sup> /μl)       | 14.3 ± 2.0  | 12.2 ± 1.5       | 13.9 ± 2.0                                                              | 12.0 ± 1.4       |
| Hemoglobin (g/dL)                | 14.6 ± 1.5  | 14.0 ± 1.9       | 14.7 ± 1.4                                                              | 14.2 ± 1.8       |
| Platelets (x10 <sup>3</sup> /μl) | 893 ± 106   | 874 ± 190        | 1011 ± 183                                                              | 1097 ± 207       |
| Heart/body weight                | 6.1 ± 0.4   | 5.5 ± 0.3        | 9.3 ± 1.3*                                                              | 10.6 ± 2.8*      |
| Lung/body weight                 | 9.0 ± 1.4   | 9.4 ± 1.5        | 8.2 ± 1.3                                                               | 9.9 ± 1.7        |

\* denotes p<0.05 compared to control groups (ANOVA, post-hoc Tukey). n=5-9 per experimental group. ALT: alanine aminotransferase. Mean values and standard deviations are displayed.



**Table S3.** (related to Figure 2) **Invasive hemodynamics of control, *CD169-DTR*, *Tnnt2* <sup>$\Delta$ K210/ $\Delta$ K210</sup>, and *Tnnt2* <sup>$\Delta$ K210/ $\Delta$ K210</sup> *CD169-DTR* mice.**

|                              | Control       |                  | <i>Tnnt2</i> <sup><math>\Delta</math>K210/<math>\Delta</math>K210</sup> |                  |
|------------------------------|---------------|------------------|-------------------------------------------------------------------------|------------------|
|                              | -             | <i>CD169-DTR</i> | -                                                                       | <i>CD169-DTR</i> |
| Heart rate<br>(beats/minute) |               |                  |                                                                         |                  |
| baseline                     | 266 ± 52      | 260 ± 72         | 273 ± 71                                                                | 308 ± 73         |
| 4 ng/min                     | 302 ± 68      | 288 ± 91         | 264 ± 54                                                                | 323 ± 92         |
| 8 ng/min                     | 341 ± 103     | 411 ± 97         | 330 ± 62                                                                | 345 ± 84         |
| 16 ng/min                    | 505 ± 129     | 549 ± 30         | 417 ± 111                                                               | 484 ± 114        |
| 32 ng/min                    | 581 ± 53      | 621 ± 58         | 457 ± 122                                                               | 553 ± 68         |
| 64 ng/min                    | 614 ± 38      | 615 ± 22         | 554 ± 44                                                                | 582 ± 58         |
| dP/dt max.<br>(mmHg/sec)     |               |                  |                                                                         |                  |
| baseline                     | 5586 ± 1184   | 5249 ± 1201      | 1871 ± 490*                                                             | 2018 ± 778*      |
| 4 ng/min                     | 7595 ± 1961   | 7451 ± 2295      | 1858 ± 652*                                                             | 3016 ± 1323*     |
| 8 ng/min                     | 11224 ± 2313  | 11044 ± 2780     | 4021 ± 1837*                                                            | 4726 ± 1455*     |
| 16 ng/min                    | 16206 ± 1851  | 15292 ± 1833     | 4832 ± 1993*                                                            | 7083 ± 1694*     |
| 32 ng/min                    | 17758 ± 1515  | 17013 ± 2142     | 5685 ± 2135*                                                            | 8070 ± 1692*     |
| 64 ng/min                    | 17686 ± 1601  | 18049 ± 1752     | 7464 ± 2790*                                                            | 8918 ± 1828*     |
| dP/dt min.<br>(mmHg/sec)     |               |                  |                                                                         |                  |
| baseline                     | -5588 ± 1044  | -5236 ± 1134     | -2266 ± 637*                                                            | -2487 ± 1213*    |
| 4 ng/min                     | -7084 ± 1848  | -7374 ± 2487     | -2312 ± 954*                                                            | -4398 ± 1746*    |
| 8 ng/min                     | -9481 ± 2146  | -9599 ± 3043     | -5204 ± 2250*                                                           | -6529 ± 1572*    |
| 16 ng/min                    | -12926 ± 1713 | -11558 ± 2533    | -6037 ± 2533*                                                           | -8768 ± 1390*    |
| 32 ng/min                    | -12584 ± 1806 | -11386 ± 3065    | -6841 ± 2255*                                                           | -9908 ± 1239     |
| 64 ng/min                    | -12094 ± 2294 | -11271 ± 2498    | -7855 ± 1911                                                            | -10139 ± 1206    |
| LVSP (mmHg)                  |               |                  |                                                                         |                  |
| baseline                     | 89.1 ± 10     | 91.4 ± 16        | 53.7 ± 13                                                               | 53.7 ± 16        |
| 4 ng/min                     | 105 ± 15      | 107 ± 27         | 54.4 ± 19                                                               | 73.7 ± 15        |
| 8 ng/min                     | 132 ± 31      | 114 ± 23         | 80.1 ± 13                                                               | 89.5 ± 11        |
| 16 ng/min                    | 153 ± 35      | 130 ± 21         | 82.9 ± 7.5                                                              | 95.7 ± 7.5       |
| 32 ng/min                    | 155 ± 40      | 142 ± 31         | 83.3 ± 6.9                                                              | 97.2 ± 11        |
| 64 ng/min                    | 155 ± 40      | 147 ± 44         | 85.8 ± 7.3                                                              | 101 ± 14         |
| LVEDP (mmHg)                 |               |                  |                                                                         |                  |
| baseline                     | 7.7 ± 1.4     | 8.4 ± 2.2        | 6.8 ± 2.0                                                               | 5.8 ± 1.4        |
| 4 ng/min                     | 9.1 ± 4.1     | 7.5 ± 2.0        | 6.2 ± 1.8                                                               | 7.1 ± 2.1        |
| 8 ng/min                     | 7.2 ± 2.6     | 6.0 ± 1.2        | 5.6 ± 2.7                                                               | 8.7 ± 4.5        |
| 16 ng/min                    | 5.5 ± 1.9     | 5.2 ± 1.5        | 5.2 ± 2.2                                                               | 7.7 ± 2.7        |
| 32 ng/min                    | 4.9 ± 1.2     | 6.8 ± 5.4        | 5.5 ± 2.3                                                               | 8.7 ± 6.0        |
| 64 ng/min                    | 6.1 ± 2.4     | 5.4 ± 2.1        | 5.2 ± 1.7                                                               | 8.1 ± 5.5        |

\* denotes  $p < 0.05$  compared to control groups (ANOVA, post-hoc Tukey). Mice received escalating doses of dobutamine (ng/ml) via intravenous infusion. Measurements were obtained at baseline and indicated dobutamine infusion rates.  $n=6$  per experimental group. dP/dt max: maximum rate of pressure increase, dP/dt min: maximum rate of pressure decrease, LVSP: peak LV systolic pressure, LVEDP: LV end diastolic pressure. Mean values and standard deviations are displayed. Data obtained from 9 week old control, *CD169-DTR*, *Tnnt2* <sup>$\Delta$ K210/ $\Delta$ K210</sup>, and *Tnnt2* <sup>$\Delta$ K210/ $\Delta$ K210</sup> *CD169-DTR* hearts after 3 weeks of DT treatment.
